# Supplementary material for: Cellulite and Focused Extracorporeal Shockwave Therapy for Non-Invasive Body Contouring: a Randomized Trial
Source: PubMed Central journal article supplement — Dermatol Ther (Heidelb). 2013 Dec 3;3(2):143–55. doi: 10.1007/s13555-013-0039-5 (PMC3889306; doi:10.1007/s13555-013-0039-5), 2013-12-03
Supplement: 13555_2013_39_MOESM1_ESM.pdf [file 13555_2013_39_MOESM1_ESM.pdf]

- Focused extracorporeal shockwave therapy (ESWT) has been demonstrated to improve wound healing and skin regeneration such as in burn wounds and scars.
- The combination of focused ESWT (0.35 mJ/mm<sup>2</sup>, 2000 impulses, six sessions) with gluteal strength training was superior to SHAM-ESWT and gluteal strength training in moderate to severe cellulite in terms of the CSS in a RCT. The mean improvement was 24% in the intervention in contrast to the control group.
- Second, the SHAM-ESWT and gluteal strength training were not able to change the CSS in a 3 months perspective.
- Long-term data are warranted to elucidate the sustainability of the aforementioned clinical effects.
- Focused ESWT appears to improve the degree of cellulite in a clinical significant way.

This summary slide represents the opinions of the authors, and not necessarily the opinions of the publisher or editorial board. This material has been peer reviewed. Sponsorship for this study and summary slide was funded by Storz Medical AG, Tägerwilen, Switzerland. For a full list of acknowledgments and conflicts of interest for all authors of this article, please see the full text online.
